# Supplementary material
Source: ML conference proceedings conference paper supplement (https://openreview.net/forum?id=ARAxPPIAhq)

# LSTM

# Memory Cells

# xLSTM Blocks

# xLSTM

## Memory Cells

- Constant Error Carousel
- Sigmoid Gating
- Recurrent Inference
- Recurrent Training

$$c_t = f_t c_{t-1} + i_t z_t$$

$$h_t = o_t \psi(c_t)$$

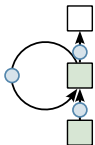

## sLSTM

- + Exponential Gating
- + New Memory Mixing

## mLSTM

- + Exponential Gating
- + Matrix Memory
- + Parallel Training
- + Covariance Update Rule

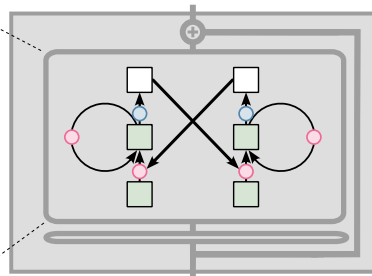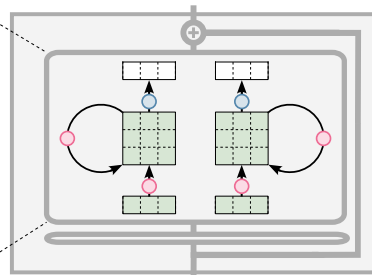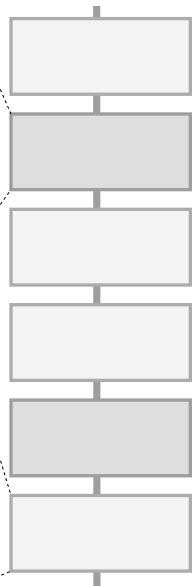

Supplement: supplementary_material [file attachment]
